# Supplementary material for: Antioxidant Effects and Phytochemical Properties of Seven Taiwanese Cirsium Species Extracts
Source: MDPI journal article supplement (doi:10.3390/molecules26133935), 2021-06-28
Supplement: s1 [file s1]

# Antioxidant Effects and Phytochemical Properties of Seven Taiwanese *Cirsium* Species Extracts

Zi-Wei Zhao <sup>1,†</sup>, Hung-Chi Chang <sup>2,†</sup>, Hui Ching <sup>3</sup>, Jin-Cherng Lien <sup>4</sup>, Hui-Chi Huang <sup>5</sup> and Chi-Rei Wu <sup>5,\*</sup>

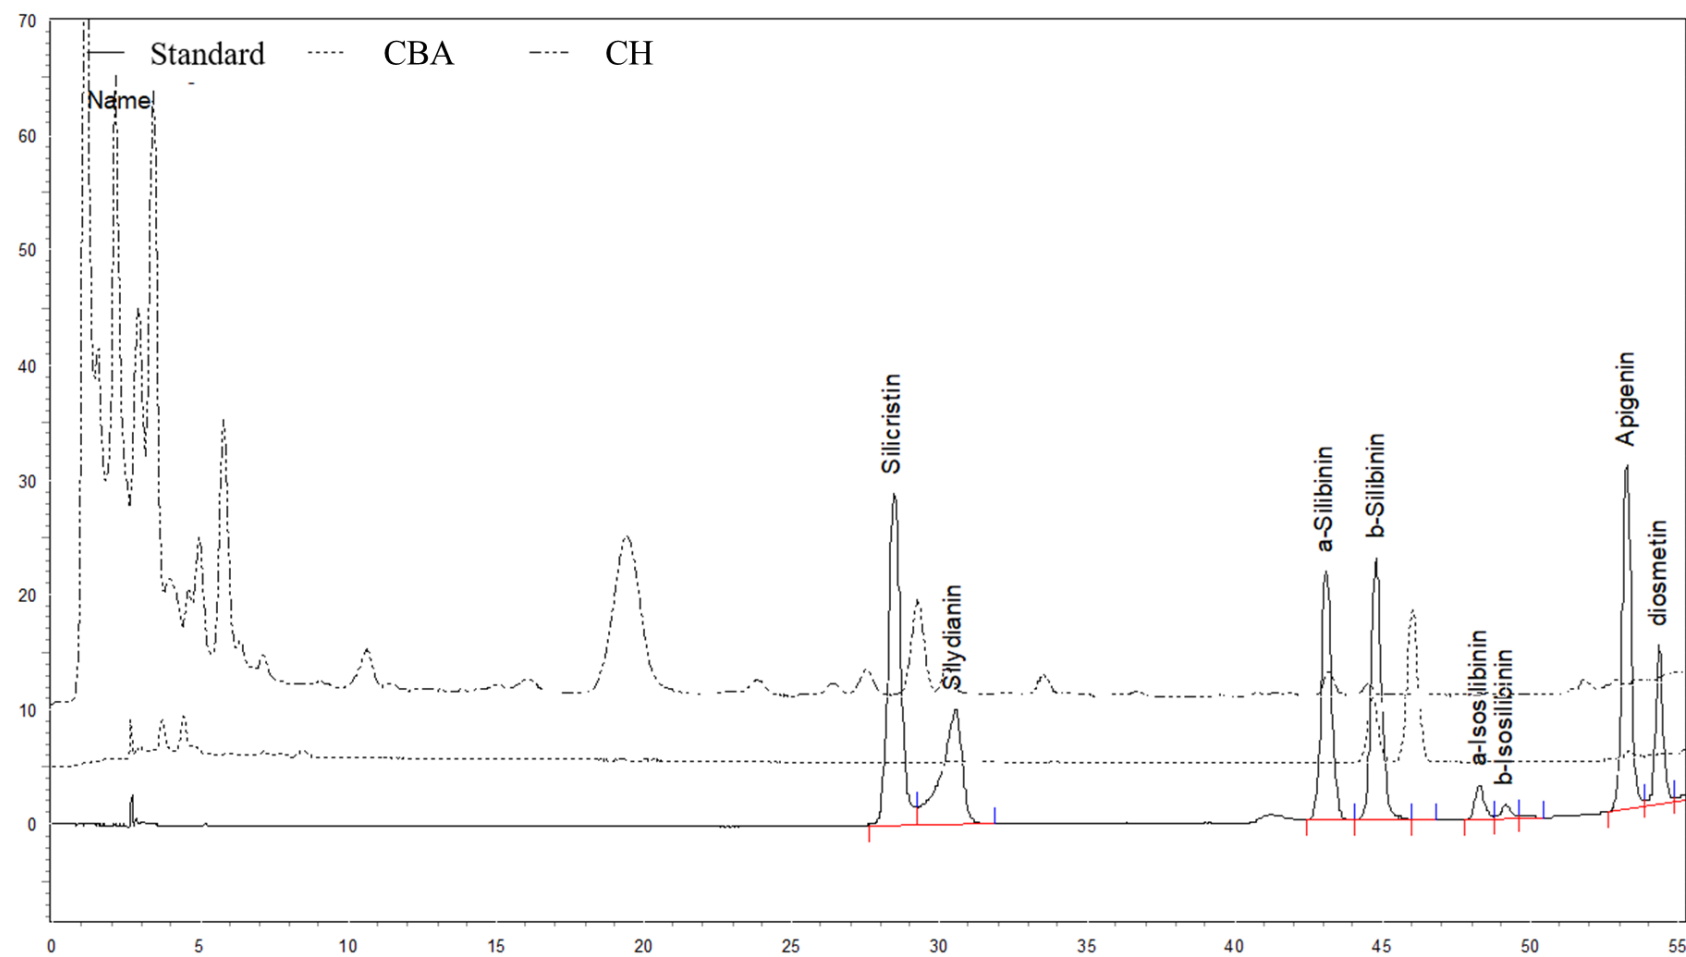

**Figure S1.** High-performance liquid chromatography (HPLC) chromatogram of standards, the methanolic standard extracts of CBA and CH at 280 nm. CBA, the aerial part of *Cirsium brevicaule*; CH, *Cirsii* Herb.

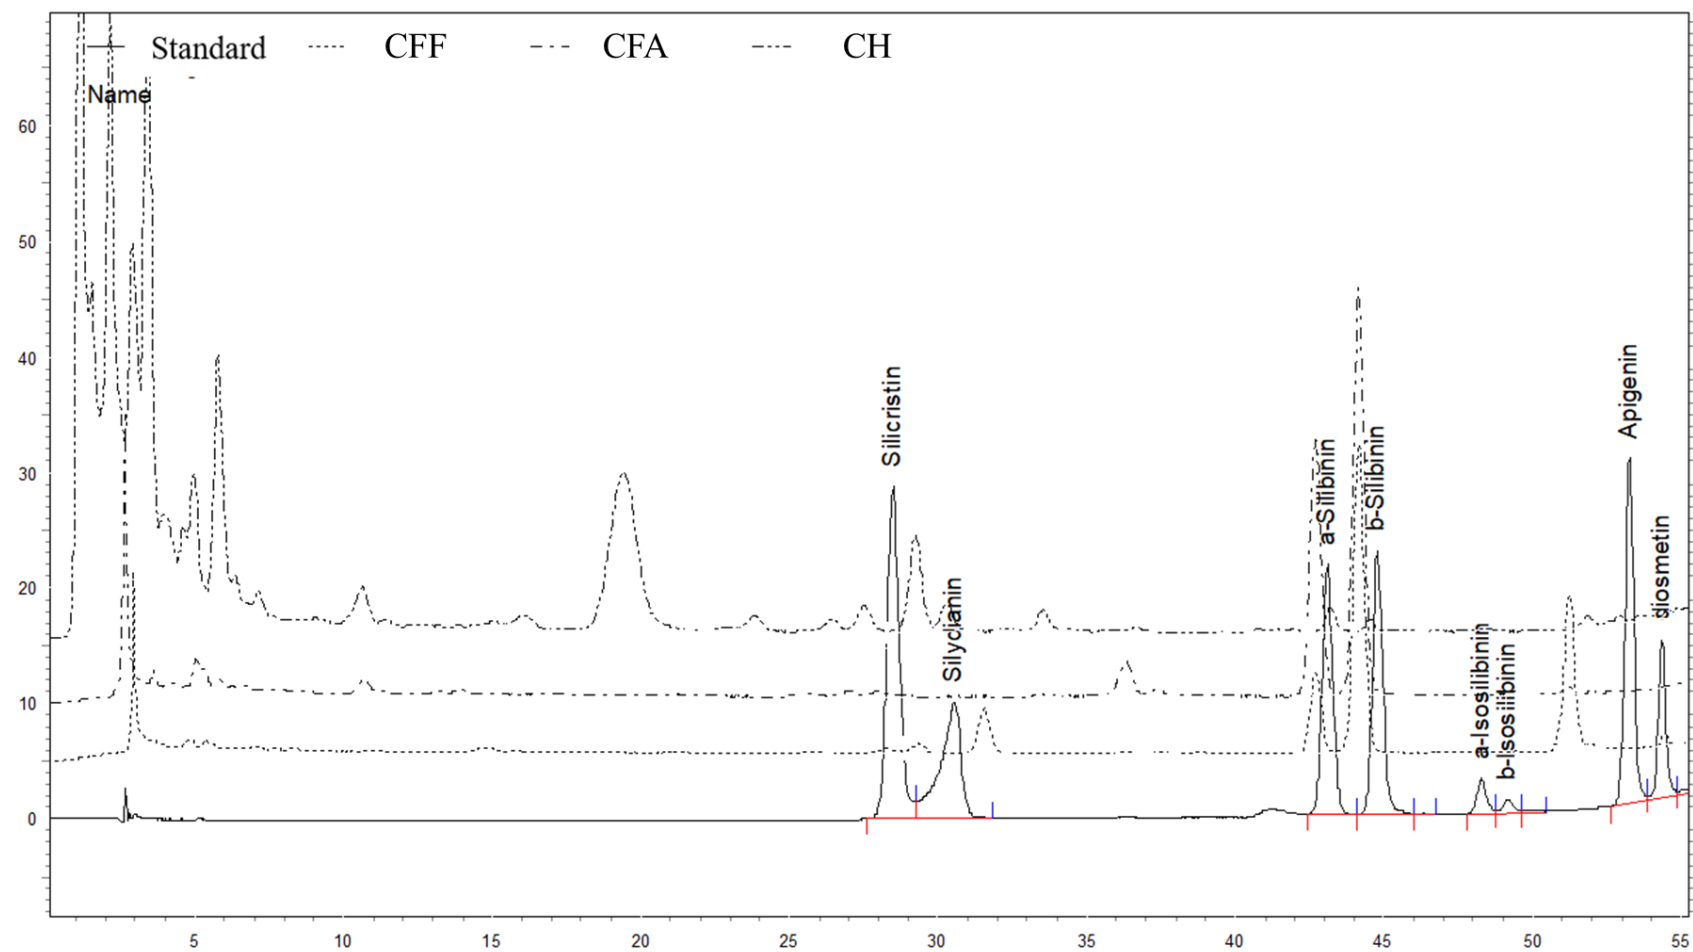

**Figure S2.** High-performance liquid chromatography (HPLC) chromatogram of standards, the methanolic standard extracts of CFA, CFF and CH at 280 nm. CFA, the aerial part of *Cirsium ferum*; CFF, the flower part of *Cirsium ferum*; CH, *Cirsii* Herb.

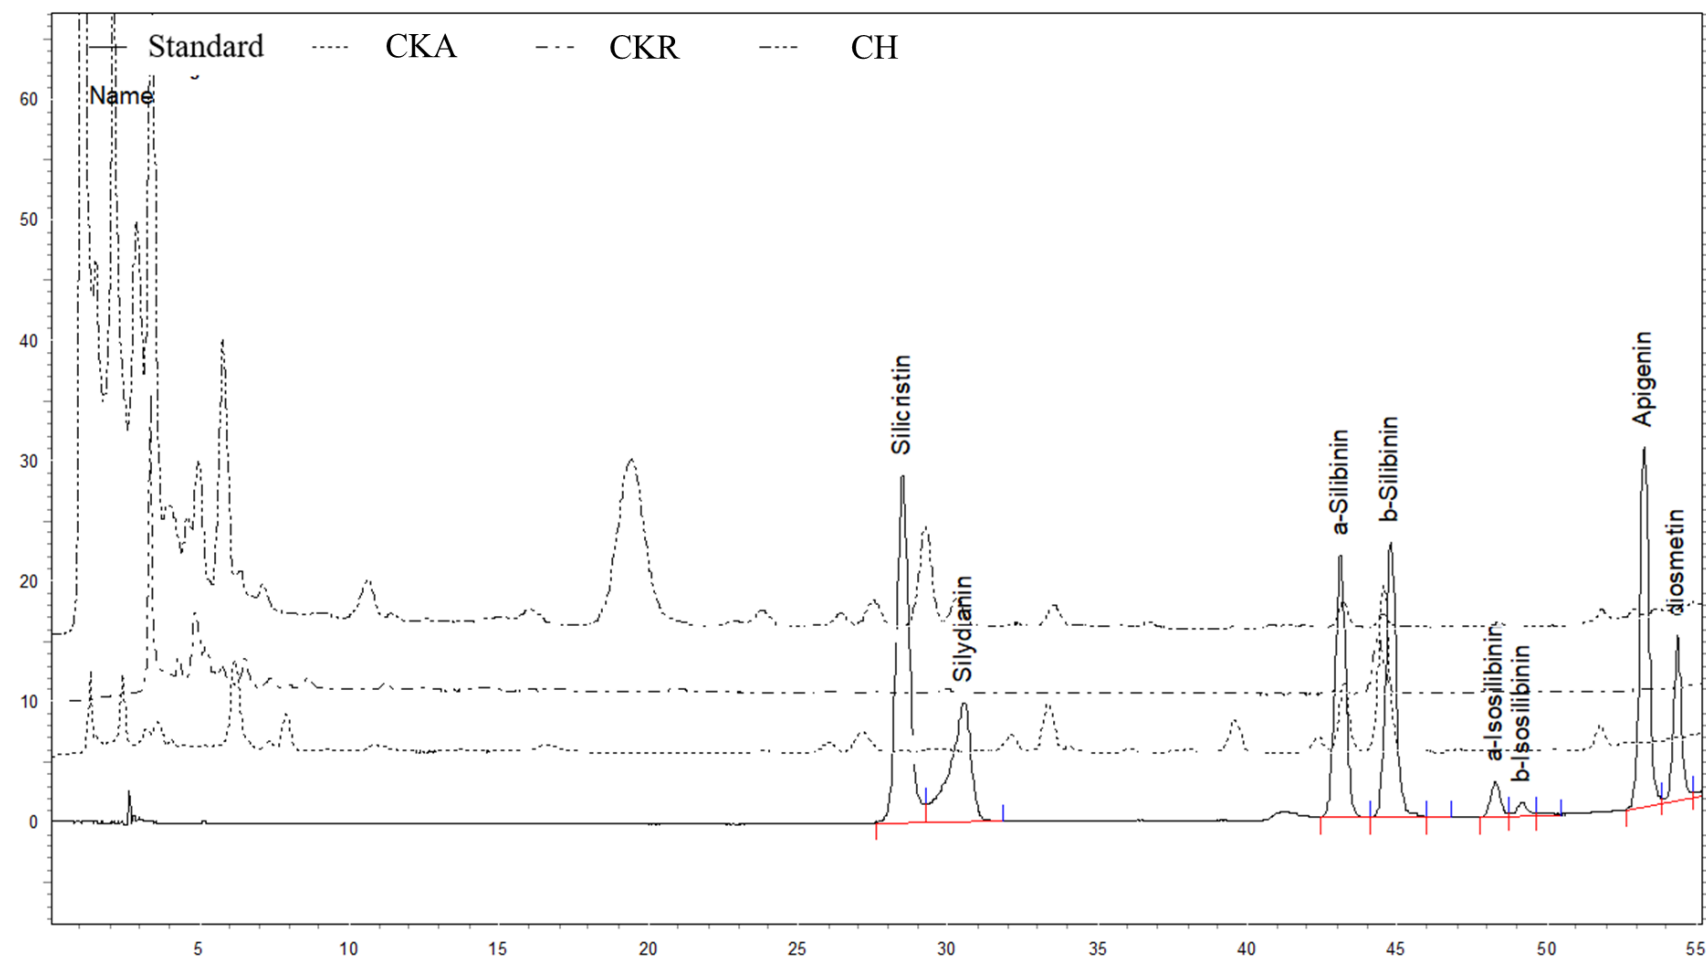

**Figure S3.** High-performance liquid chromatography (HPLC) chromatogram of standards, the methanolic standard extracts of CKA, CKR and CH at 280 nm. CKA, the aerial part of *Cirsium kawakamii*; CKR, the radix part of *Cirsium kawakamii*; CH, *Cirsii* Herb.

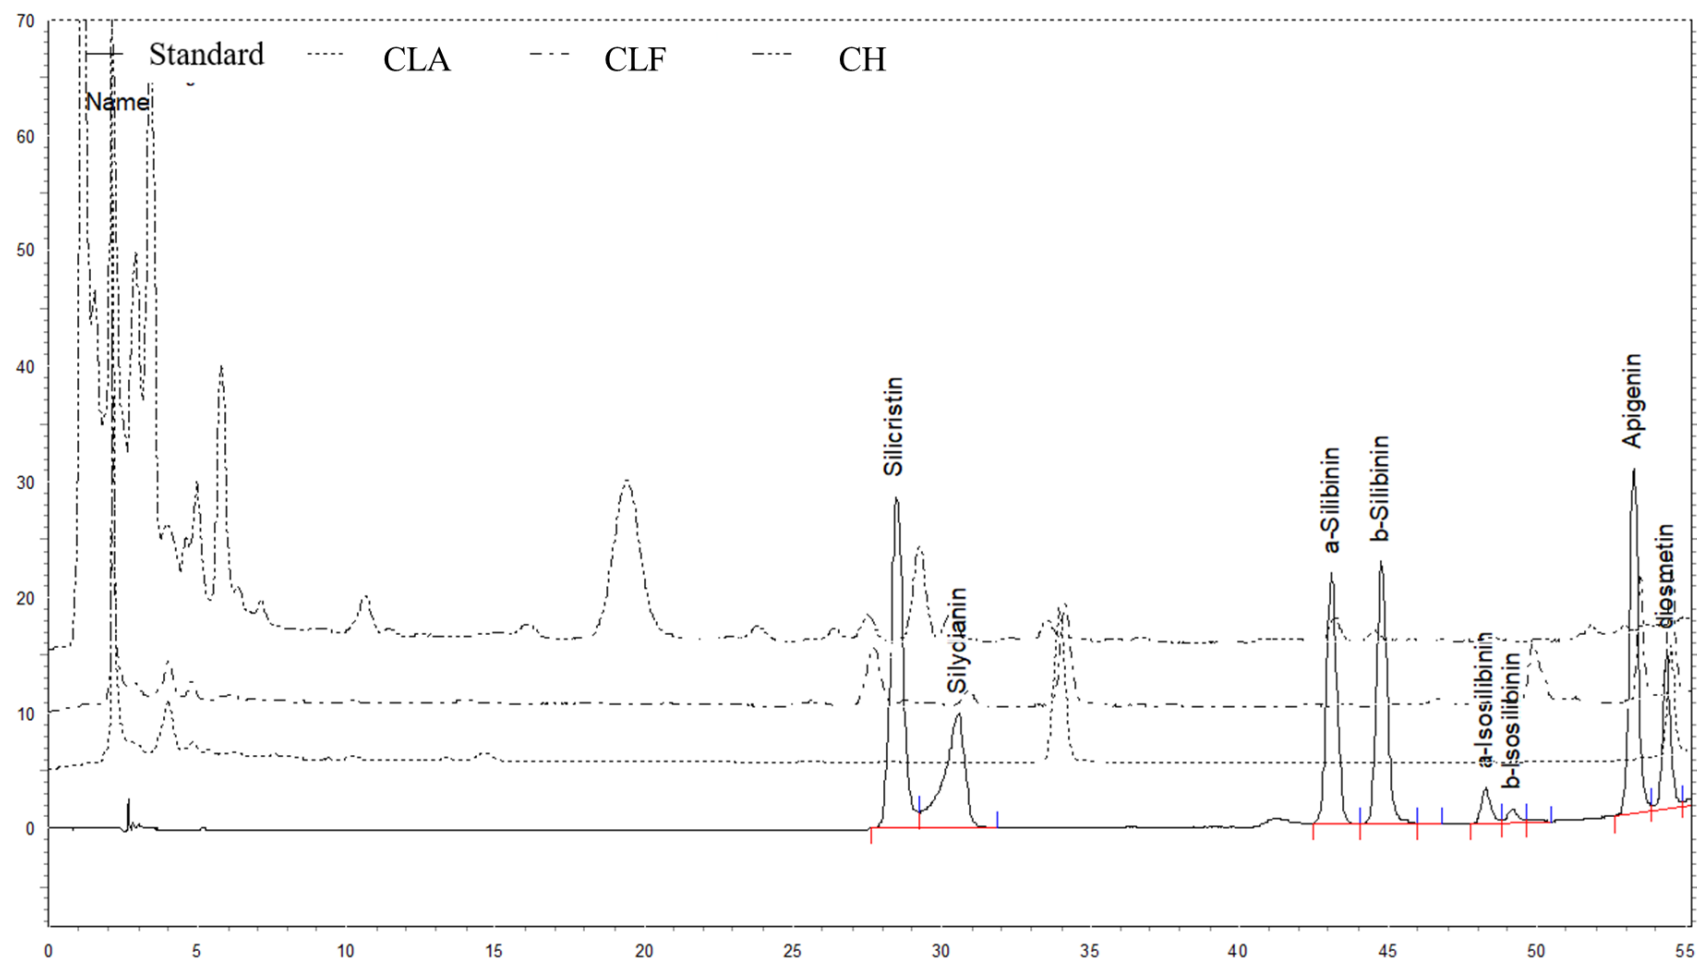

**Figure S4.** High-performance liquid chromatography (HPLC) chromatogram of standards, the methanolic standard extracts of CLA, CLF and CH at 280 nm. CLA, the aerial part of *Cirsium lineare*; CLF, the flower part of *Cirsium lineare*; CH, *Cirsii Herb*.
